# Supplementary material for: Pilot feasibility study of a semi-automated three-dimensional scoring system for cervical dystonia
Source: PLoS One. 2019 Aug 8;14(8):e0219758. doi: 10.1371/journal.pone.0219758 (PMC6687132; doi:10.1371/journal.pone.0219758)
Supplement: S2 File — (XLSX) [file pone.0219758.s002.xlsx]

## Sheet: System
exam_id	auto	severity_scale	a1_head_rotation_angle	a1_rotation_scale	a2_head_lat_angle	a2_lat_scale	a3_head_ar_angle	a3_ar_scale	a4_l_shift_distance	a4_l_shift_scale	a5_s_shift_angle	a5_s_shift_scale	b_duration_scale	c_head_rotation_angle	c_head_lat_angle	c_head_ar_angle	c_effect_of_sensory_tricks_scale	d_shoulder_maximal_range	d_shoulder_scale	e_rm_reach_angle_as_yaw	e_rm_reach_angle_as_roll	e_rm_reach_angle_as_pitch	e_range_of_motion_scale	f_time_1st	f_time_2nd	f_time_scale
cd01	24	25	-49.439	3	-19.2562	2	-10.4378	1		0		0	5				1	25.659	3	25.3884	8.52538	21.0268	1	4	4	4
cd02	17	19	11.7402	1	-13.1109	1	-5.34442	1		0		0	4				2	5.46674	1	10.1134	13.6091	3.74524	1	4	4	4
cd03	18	18	-1.65549	0	-15.3135	2	6.40722	1		0		0	5				0	1.1494	0	0.100987	12.646	4.13395	1	4	4	4
cd04	21	22	-27.0298	2	-23.3523	2	-22.5543	2		0		0	4				1	16.0993	3	29.3753	6.12211	32.2341	0	4	4	4
cd05	21	22	-59.1678	3	-14.4742	1	-13.9796	1		0		0	5				1	6.77581	2	0	0	0	0	4	4	4
cd06	22	24	-26.6432	2	-10.8023	1	-13.8141	1		0		0	5				2	19.0155	3	16.6549	5.12136	2.17428	1	4	4	4
cd07	24	26	-46.2666	3	-16.3323	2	-14.6749	1		0		0	5				2	38.7333	3	41.7448	14.3164	12.8271	1	4	4	4
cd08	20	21	-44.6238	2	-16.7256	2	11.6575	1		0		0	4				1	21.6495	2	0	0	0	1	4	4	4
cd09	17	19	11.4808	1	12.4658	1	2.70778	0		0		0	5				2	0.809295	0	1.48975	10.651	3.5461	1	4	4	4
cd10	21	23	46.0684	3	2.28206	0	-33.5318	3		0		0	5				2	0.491364	0	51.4776	13.0162	20.7602	1	4	4	4
cd11	20	23	-6.77877	1	-8.58191	1	-22.3982	2		1		0	5				2	3.72132	1	3.92511	7.40631	21.007	1	4	4	4
cd12	19	22	-33.1191	2	25.0247	2	-20.2208	2		1		0	4				2	6.29338	1	22.1832	22.303	22.9897	0	4	4	4
cd13	15	17	5.54464	1	5.7514	1	-4.53537	1		0		0	4				2	4.26951	1	1.37351	2.85854	3.35313	0	3	3	3
cd14	13	15	-5.60723	1	3.08841	1	-4.47649	1		0		0	4				2	3.18946	1	20.2513	2.32765	9.77609	1	0	0	0
cd15	21	22	31.558	2	10.06	1	34.4214	3		0		0	5				1	1.10254	0	26.6928	7.04407	29.5434	1	4	4	4
cd16	24	26	-32.4142	2	-21.2657	2	-29.6776	2		0		0	5				2	27.1816	3	20.2445	33.498	18.3001	1	4	4	4
cd17	21	22	2.92483	0	-34.9325	2	-10.0538	1		0		0	5				1	8.87117	3	0	0	0	1	4	4	4
cd18	22	24	-33.4363	2	-25.4398	2	-13.244	1		0		0	5				2	17.0776	2	0	0	0	1	4	4	4
cd19	16	18	6.56251	1	3.16642	1	-20.0155	2		0		0	4				2	1.4882	0	4.46377	1.23443	10.0137	0	4	4	4
cd20	16	19	5.49611	1	-7.08927	1	-14.3779	1		0		1	4				2	0.543847	0	0.780197	4.30548	3.34879	1	4	4	4
cd21	18	19	36.2053	2	-2.05675	0	15.2589	2		0		0	4				1	3.5378	1	20.2924	2.63153	14.8396	1	4	4	4
cd22	19	20	-17.4099	1	9.992	1	-19.0484	2		0		0	5				1	3.13944	1	7.7494	4.57379	13.6197	0	4	4	4
cd23	18	20	16.0961	1	6.37035	1	-12.8801	1		0		0	5				2	1.33383	0	10.4653	2.17743	0.793734	1	4	4	4
cd24	17	19	-19.3019	1	-8.06068	1	-16.1309	2		0		0	5				2	17.3756	2	55.7902	10.6496	6.06128	1	0	0	0
cd25	19	20	18.4234	1	-18.674	2	-17.4473	2		0		0	4				1	7.45915	1	8.77998	5.99142	5.66545	1	4	4	4
cd26	15	16	13.8176	1	-11.0837	1	-8.22039	1		0		0	5				1	1.46537	0	43.1609	0.792988	12.3019	1	0	0	1
cd27	17	18	-28.6406	2	-2.3725	0	-6.33778	1		0		0	4				1	7.13041	1	19.6991	1.02575	5.70024	1	4	4	4
cd28	18	19	-10.6415	1	3.96881	1	-11.319	1		0		0	5				1	1.67807	0	44.659	2.97951	9.5862	1	4	4	4
cd29	19	21	-4.75149	1	4.51129	1	-20.4768	2		0		0	5				2	2.74966	0	3.5391	3.42719	24.3874	1	4	4	4
cd30	18	20	4.94078	1	14.4008	1	15.777	2		0		0	4				2	18.7825	1	0	0	0	1	4	4	4

## Sheet: Neurologist
exam_id		severity_scale	a1_head_rotation_angle	a1_rotation_scale	a2_head_lat_angle	a2_lat_scale	a3_head_ar_angle	a3_ar_scale	a4_l_shift_distance	a4_l_shift_scale	a5_s_shift_angle	a5_s_shift_scale	b_duration_scale	c_head_rotation_angle	c_head_lat_angle	c_head_ar_angle	c_effect_of_sensory_tricks_scale	d_shoulder_maximal_range	d_shoulder_scale	e_rm_reach_angle_as_yaw	e_rm_reach_angle_as_roll	e_rm_reach_angle_as_pitch	e_range_of_motion_scale	f_time_1st	f_time_2nd	f_time_scale
cd01	21	22		3		1		1		0		0	5				1		2				1			3
cd02	20	23		1		2		0		0		1	5				2		1				2			4
cd03	16	17		0		2		0		0		0	5				1		0				0			4
cd04	19	20		4		2		0		0		0	4				1		1				0			4
cd05	18	19		4		0		0		0		0	5				1		0				0			4
cd06	17	19		2		0		0		0		0	5				2		1				0			4
cd07	20	21		3		1		1		0		0	5				1		1				0			4
cd08	18	19		4		1		2		0		0	3				1		1				1			3
cd09	19	21		1		1		1		0		0	5				2		2				0			4
cd10	26	28		3		2		2		0		0	5				2		2				3			4
cd11	16	18		0		1		0		0		0	5				2		1				0			4
cd12	17	18		2		2		1		0		0	4				1		1				1			2
cd13	14	16		1		1		1		1		0	5				1		1				0			0
cd14	13	13		1		1		0		0		0	5				0		1				0			0
cd15	22	23		2		1		2		0		0	5				1		1				2			4
cd16	23	24		2		2		1		0		0	5				1		3				1			4
cd17	22	23		0		3		0		0		0	5				1		2				3			4
cd18	21	22		3		2		1		0		0	4				1		1				3			3
cd19	6	8		1		0		0		0		0	2				2		1				0			0
cd20	15	18		1		1		0		0		1	4				2		1				1			3
cd21	18	19		2		2		1		0		0	4				1		1				0			4
cd22	18	18		2		1		1		0		0	5				0		1				0			3
cd23	15	16		1		0		0		0		0	5				1		1				1			2
cd24	13	15		0		1		0		0		0	5				2		1				1			0
cd25	20	22		1		3		1		0		1	5				1		1				0			4
cd26	14	14		1		2		1		0		0	5				0		0				0			0
cd27	19	20		3		1		1		0		0	4				1		2				0			4
cd28	17	19		1		1		1		0		0	5				2		1				0			3
cd29	12	14		1		1		0		0		0	5				2		0				0			0
cd30	15	16		1		1		1		0		0	5				1		1				1			0
